# Supplementary material
Source: HighWire-hosted journal article supplement (https://cmajopen.ca/highwire/filestream/84939/field_highwire_adjunct_files/0/2020-0096-original-submission.pdf)
Supplement: 2020-0096-original-submission.pdf [file 2020-0096-original-submission.pdf]

1  
2  
3 1 **Title:** Disability-Free Survival after Major Cardiac Surgery in a Population-Based Cohort  
4  
5  
6 2

7  
8 3 **Authors:** Louise Y. Sun, MD, SM; Anan Bader Eddeen, MSc; Thierry G. Mesana, MD, PhD  
9

10 4 **Affiliations:** From the Division of Cardiac Anesthesiology, Department of Anesthesiology and  
11  
12 5 Pain Medicine, University of Ottawa Heart Institute, Ontario, Canada (LYS); the School of  
13  
14 6 Epidemiology and Public Health, University of Ottawa, Ontario, Canada (LYS); the Institute for  
15  
16 7 Clinical Evaluative Sciences, Ontario, Canada (LYS, ABE); the Division of Cardiac Surgery,  
17  
18 8 Department of Surgery, University of Ottawa Heart Institute, Ontario, Canada (TGM).  
19  
20  
21

22  
23 9 **Address for Correspondence and Reprints:**

24  
25 10 Louise Y. Sun, MD, SM, FRCPC, FAHA  
26  
27 11 Room H2410, 40 Ruskin Street  
28  
29 12 Ottawa, ON K1Y 4W7  
30  
31 13 Phone: 1 613 696 7381 Fax: 1 613 696 7099  
32  
33 14 Email: [lsun@ottawaheart.ca](mailto:lsun@ottawaheart.ca)  
34  
35  
36  
37  
38

39 16 **Sources of Support:** We acknowledge support from an operating grant from the Canadian  
40  
41 17 Institutes of Health Research (Grant #4752). Dr. Sun is supported by the Ottawa Heart Institute  
42  
43 18 Research Corporation. The funders do not have a role in the design and conduct of the study, in  
44  
45 19 the collection, analysis, and interpretation of the data, nor in the preparation, review, or approval  
46  
47 20 of the manuscript.  
48  
49

50 21 **Disclosures:** None  
51  
52  
53  
54

55 23 **Running Title:** Disability-free survival after heart surgery  
56  
57  
58  
59  
60

1  
2  
3 **1 ABSTRACT**  
4

5 **2 Background:** Cardiovascular research has been dedicated to “tombstone” outcomes such as  
6  
7  
8 **3** death and complications, with little attention paid to outcomes that may also be important from a  
9  
10 **4** patient’s perspective. We examined the rates of disability-free survival as a novel, patient-  
11  
12  
13 **5** defined outcome after cardiac surgery.

14 **6 Methods:** This was a retrospective cohort study of patients  $\geq 40$  years of age who underwent  
15  
16  
17 **7** coronary artery bypass grafting (CABG) and/or aortic, mitral, tricuspid valve surgery in Ontario  
18  
19 **8** between October 1 2008-December 31 2016. The primary outcome was disability (composite of  
20  
21  
22 **9** stroke,  $\geq 3$  non-elective hospitalizations and long-term care admission) within one year after  
23  
24 **10** surgery. The procedure-specific risk of disability was assessed using a multivariable Fine and  
25  
26 **11** Gray subdistribution hazards model with death as a competing risk.

27  
28 **12 Results:** Of 72,824 patients, 2,431 (4.6%) developed disability in the year after CABG, 677  
29  
30  
31 **13** (6.5%) after single valve, 118 (9.0%) after multiple valves, 718 (9.0%) after CABG/single valve,  
32  
33 **14** and 87 (13.1%) after CABG/multiple valve surgery. With isolated CABG as the reference group,  
34  
35 **15** the adjusted HRs for disability were 1.34 (95% CI: 1.21-1.48) after single valve, 1.43 (1.18-1.75)  
36  
37 **16** after multiple valves, 1.38 (1.26-1.51) after CABG/single valve, and 1.78 (1.43-2.23) after  
38  
39 **17** CABG/multiple valve surgery. Combined CABG/multiple valve surgery, heart failure, creatinine  
40  
41  
42 **18**  $\geq 180$   $\mu\text{mol/L}$ , alcoholism, dementia and depression were independent disability risk factors.

43  
44 **19 Interpretation:** We found that the cumulative incidence of disability was lowest after isolated  
45  
46  
47 **20** CABG and highest after combined CABG/multiple valve reconstruction. Our findings point to a  
48  
49 **21** need for personalized disability risk prediction models to better enable patient-centered care.  
50  
51  
52  
53  
54  
55  
56  
57  
58  
59  
60

## 1 INTRODUCTION

2 Cardiac surgery is a growing field, with two million procedures currently being performed  
3 globally each year.<sup>1</sup> The last two decades have seen important advances in surgical and  
4 perioperative care, as well as improved patient survival.<sup>2-4</sup> On the other hand, as patients  
5 presenting for surgery become increasingly elderly and frail, they shift their goals and priorities  
6 towards how surgery might affect personal freedom and mobility, rather than to provide  
7 longevity alone.<sup>5-9</sup> New or residual impairments after surgery are of particular concern to patients  
8 and clinicians alike, but the quality and standard of cardiac care long has been assessed by  
9 traditional “tombstone” measures such as mortality and major adverse cardiovascular events  
10 (MACE).<sup>5, 8, 10-12</sup> Indeed, patient-centered care represents a priority area for modern medical  
11 practice and research, and the facilitation of shared surgical decision making could be improved  
12 by incorporating patient perspectives and patient-derived data.<sup>13-15</sup>

13 Our group has recently derived “disability-free survival” as a novel, patient-defined  
14 outcome through a large-scale survey of > 3000 patients with cardiovascular diseases.<sup>16</sup>  
15 According to patient preferences and values, disability was defined as the composite of stroke,  
16 recurrent non-elective hospitalizations and nursing home admission.<sup>16</sup> Before this outcome  
17 measure could be meaningfully utilized to inform patient-centered decision-making, its  
18 epidemiology and impact need to first be described at the population level. We therefore  
19 conducted the current study to examine the rates of disability-free survival after major cardiac  
20 surgery in a population-based cohort.

21

1  
2  
3 **1 METHODS**

4  
5 **2 *Design and Study Population***

6  
7  
8  
9  
10  
11  
12  
13  
14  
15  
16  
17  
18  
19  
20  
21  
22  
23  
24  
25  
26  
27  
28  
29  
30  
31  
32  
33  
34  
35  
36  
37  
38  
39  
40  
41  
42  
43  
44  
45  
46  
47  
48  
49  
50  
51  
52  
53  
54  
55  
56  
57  
58  
59  
60

3 We conducted a population-based, retrospective cohort study in Ontario, Canada. The use  
4 of data in this project was authorized under section 45 of Ontario's *Personal Health Information*  
5 *Protection Act*, which does not require review by a Research Ethics Board.<sup>17</sup>

6  
7  
8  
9  
10  
11  
12  
13  
14  
15  
16  
17  
18  
19  
20  
21  
22  
23  
24  
25  
26  
27  
28  
29  
30  
31  
32  
33  
34  
35  
36  
37  
38  
39  
40  
41  
42  
43  
44  
45  
46  
47  
48  
49  
50  
51  
52  
53  
54  
55  
56  
57  
58  
59  
60

6 Included were adult Ontario residents 40 years of age or older, who underwent CABG,  
7 and/or aortic, mitral or tricuspid valve surgery between October 1, 2008 and December 31, 2016.  
8 For those patients who underwent multiple cardiac procedures during the study period, the first  
9 procedure was considered the index procedure. Exclusion criteria were non-Ontario residency  
10 status, those with missing information regarding age and sex, and those who had concomitant  
11 arrhythmia, pulmonic valve or thoracic aorta surgery. A flow diagram detailing the process used  
12 to select the study cohort is shown in Supplemental Figure 1. During the study period, Ontario  
13 was Canada's most populous province with a publicly funded, universal health care system that  
14 reimbursed all covered services and providers.

15  
16 **16 *Data Sources***

17  
18  
19  
20  
21  
22  
23  
24  
25  
26  
27  
28  
29  
30  
31  
32  
33  
34  
35  
36  
37  
38  
39  
40  
41  
42  
43  
44  
45  
46  
47  
48  
49  
50  
51  
52  
53  
54  
55  
56  
57  
58  
59  
60

17 We used the administrative healthcare databases from the Institute for Clinical Evaluative  
18 Sciences (ICES) with information on all Ontario residents, and the detailed clinical registry data  
19 from CorHealth Ontario. CorHealth Ontario maintains a prospective registry of all patients who  
20 undergo invasive cardiac procedures in Ontario. All 20 advanced cardiac hospitals in Ontario  
21 participate in the registry. It captures demographic, comorbidity and procedural-related  
22 information and has been validated through selected chart audits. In addition, CorHealth Ontario  
23 ejection fraction and angiographic data undergo core laboratory validation.<sup>18</sup>

1  
2  
3 1 Individuals who underwent the specified cardiac procedures were identified from the  
4  
5 2 CorHealth Ontario registry, and linked deterministically to the ICES administrative databases by  
6  
7 3 using encrypted unique confidential codes. Specifically, the date and type of cardiac procedures,  
8  
9 4 physiologic and comorbidity data from CorHealth Ontario were linked with the Canadian  
10  
11 5 Institute for Health Information's Discharge Abstract Database (DAD; comorbidities and  
12  
13 6 hospital admissions) and Same Day Surgery (SDS) database (comorbidities), the Ontario Health  
14  
15 7 Insurance Plan (OHIP) database (physician service claims), the Registered Persons Database  
16  
17 8 (RPDB; ascertainment of vital statistics), the Continuing Care Reporting System (CCRS;  
18  
19 9 admissions to long-term care facilities) and Canadian census. These administrative databases  
20  
21 10 have been validated for many outcomes, exposures, and comorbidities, including heart failure  
22  
23 11 (HF), chronic obstructive pulmonary disease (COPD), asthma, hypertension, myocardial  
24  
25 12 infarction (MI) and diabetes.<sup>19-22</sup>

### 13 14 ***Comorbidities***

15 Comorbidities were identified from the CorHealth Ontario registry and supplemented  
16  
17 16 with data from DAD, SDS and OHIP using International Classification of Diseases 10<sup>th</sup> Revision  
18  
19 17 (ICD-10-CA) codes<sup>23</sup> within five years prior to the index procedure, according to validated  
20  
21 18 algorithms.<sup>19,21,24,24,25, 26</sup> We estimated socioeconomic status based on patients' neighborhood  
22  
23 19 median income in the Canadian census, and determined their residence (rural versus urban) using  
24  
25 20 the definitions from Statistics Canada.<sup>27</sup> Procedural urgency was ascertained from the CorHealth  
26  
27 21 Ontario registry. Height, weight and body mass index (BMI) were identified from the CorHealth  
28  
29 22 Ontario registry, and used to define morbid obesity (weight >159 kg or BMI  $\geq$ 40 kg/m<sup>2</sup>).<sup>16, 26, 28,</sup>  
30  
31 23 <sup>29</sup> Frailty status was identified using the Johns Hopkins Adjusted Clinical Groups frailty-defining

1 diagnoses indicator, which is an instrument designed and validated for research of frailty-related  
2  
3  
4  
5  
6  
7  
8  
9  
10  
11  
12  
13  
14  
15  
16  
17  
18  
19  
20  
21  
22  
23  
24  
25  
26  
27  
28  
29  
30  
31  
32  
33  
34  
35  
36  
37  
38  
39  
40  
41  
42  
43  
44  
45  
46  
47  
48  
49  
50  
51  
52  
53  
54  
55  
56  
57  
58  
59  
60

1 diagnoses indicator, which is an instrument designed and validated for research of frailty-related  
2 outcomes and resource utilization using administrative data.<sup>29-34</sup>

#### 4 ***Outcomes***

5 The primary outcome was disability, defined as patient-derived composite of stroke,  
6 nursing home admission, and recurrent non-elective hospital admissions of  $\geq 3$  episodes  
7 occurring within 1 year of surgery. Secondary outcomes consisted of all-cause death and each  
8 individual component of disability. Stroke requiring hospitalization was identified using a  
9 validated algorithm with 70% sensitivity and 99% specificity.<sup>35</sup> Non-elective hospital admissions  
10 were ascertained by using the DAD, and long-term care admissions were ascertained using the  
11 CCRS.

#### 13 ***Statistical Analysis***

14 Continuous variables are expressed as mean (standard deviation) and categorical  
15 variables as number (proportions). Outcomes were assessed through December 31, 2017.  
16 Patients were censored when they lost possession of a valid Ontario health insurance card.  
17 Disability-free survival was defined as survival time from the date of index surgery until the date  
18 of a disability-defining event, death or last follow-up, whichever occurred earlier. For patients  
19 experiencing recurrent non-elective hospitalizations, disability was considered to occur on the  
20 date of the first admission. To account for death as a competing risk, we estimated the  
21 cumulative incidence of disability over time using Cumulative Incidence Functions (CIFs), and  
22 the risk of disability and each of the disability-defining events with multivariable Fine and Gray  
23 subdistribution hazards models using the variables listed in Table 3. We explored whether sex

1 had a modifying effect on the relationship between disability and type of surgery, by using a  
2 multiplicative interaction term of sex\*type of surgery within each of the multivariable time-to-  
3 event models.

4 Analyses were performed using SAS 9.4 (SAS Institute, Cary, NC), with statistical  
5 significance defined by a two-sided P-value of  $< 0.05$ . We used the adjusted hazard ratio (HR)  
6 and associated 95% confidence intervals (CI) to describe the measure of association, and defined  
7 a clinically meaningful effect as  $HR \geq 1.50$ .

Confidential

## 1 RESULTS

### 2 *Baseline Characteristics*

3 A total of 72,824 patients were included in the study. The baseline patient characteristics  
4 according to type of surgery are summarized in Table 1. Isolated CABG accounted for 72% of  
5 the provincial procedure volume. These were most likely to be performed in younger men with a  
6 history of previous MI and PCI; and least likely to be performed in those with HF. Compared to  
7 those who underwent combined CABG/valve procedures, those who underwent isolated valve  
8 surgery were younger and were more likely to have preserved LVEF and a lower burden of  
9 comorbidities as evidenced by a lower Charlson comorbidity index. Further, those who  
10 underwent combined CABG/multiple valve surgery were amongst the frailest and burdened with  
11 the highest number of comorbidities.

### 13 *Effect Modification by Sex*

14 As we did not observe a statistically significant interaction effect between sex and type of  
15 surgery (interaction  $p = 0.07$ ), subsequent analyses were not stratified by sex.

### 17 *Disability-Free Survival*

18 Table 2 summarizes the rates of disability, death and individual disability-defining events  
19 according to surgery type. Figure 1 illustrates the cumulative incidence of disability, and Figure  
20 2 the estimated survival at one-year. The incidence proportions of disability and death were as  
21 follows: 2,431 (4.6%) vs. 1,839 (3.5%) in the CABG-only group; 677 (6.5%) vs. 540 (5.2%) in  
22 the single valve group; 118 (9.0%) vs. (10.7%) in the multiple valves group; 718 (9.0%) vs. 734  
23 (9.2%) in the CABG/single valve group; and 87 (13.1%) vs. 94 (14.1%) in the CABG/multiple



1 valves group. Overall, the one-year cumulative incidence of disability was lowest in patients who  
2 underwent isolated CABG and highest after CABG/multiple valve surgery. Disability occurred  
3 more frequently than death in the year after isolated CABG and single valve surgery.

#### 4 5 ***Disability-Defining Events***

6 The cumulative incidence of stroke, recurrent non-elective hospitalizations and long-term  
7 care admissions varied by type of surgery (Table 1 and Supplemental Figures 2-4). Specifically,  
8 the rates of all three events were lowest after isolated CABG, highest after combined  
9 CABG/multiple valve reconstruction, and were similar after multiple valve and CABG/single  
10 valve surgery.

#### 11 12 ***Disability Risk Factors***

13 The multivariable predictors of disability are summarized in Table 3. With isolated CABG  
14 as the reference group, the adjusted subdistribution HRs for disability were 1.34 (95% CI, 1.21-  
15 1.48) for single valve, 1.43 (1.18-1.75) for multiple valves, 1.38 (1.26-1.51) for CABG/single  
16 valve and 1.78 (1.43-2.23) for CABG/multiple valve reconstruction. Other statistically  
17 significant risk factors of disability were age, female sex, emergent operative status, low income,  
18 a history of hypertension, atrial fibrillation, MI, HF, cerebrovascular disease, peripheral arterial  
19 disease, current smoker, COPD, diabetes, anemia, renal insufficiency, liver disease, alcoholism,  
20 dementia, depression, and cancer. Of these, CABG/multiple valve surgery, HF, baseline  
21 creatinine  $\geq 180$   $\mu\text{mol/L}$ , alcoholism, dementia and depression were the most clinically  
22 significant predictors of disability.

## 1 INTERPRETATION

2 To our knowledge, this is the first population-based study to systematically describe the  
3 incidence and risk factors of patient-defined disability after common cardiac procedures. We  
4 found that: 1) the cumulative incidence of disability was lowest after isolated CABG and highest  
5 after CABG/multiple valve surgery. 2) Disability occurred more frequently than death in the year  
6 after isolated CABG and single valve surgery. 3) Combined CABG/multiple valve surgery, HF,  
7 baseline creatinine  $\geq 180 \mu\text{mol/L}$ , alcoholism, dementia and depression were important  
8 predictors of disability in the year after cardiac surgery.

### 9 10 *The Need for Patient-Defined Outcomes in Cardiovascular Research*

11 Traditional revascularization trials have sometimes been referred to as “tombstone trials”<sup>6</sup>  
12 due to their focus on death and complications. However, a survey of cardiovascular patients  
13 indicated that important outcomes identified by patients were in fact very different compared to  
14 those from the clinician’s view.<sup>16</sup> Indeed, the incorporation of patient perceptions and values into  
15 the design of outcome measures has been proposed as a priority area for cardiovascular research.  
16 Such a paradigm shift has been shown to increase the relevance of the research to the end user,  
17 speed up the uptake of research into practice, and empower patients to make better informed  
18 decisions.<sup>36</sup>

19 To date, few studies have directly engaged surgical patients to determine what outcomes  
20 were meaningful to them as important end users of the research. Such studies include surveys of  
21 noncardiac surgery patients to rank outcomes such as postoperative nausea, vomiting, pain and  
22 somnolence in order of unpleasantness,<sup>37-39</sup> but similar research has not been conducted in the  
23 realm of cardiac surgery. “Patient-centered” cardiac surgery research has instead employed

1 standard, clinician-derived instruments (e.g., Seattle Angina Questionnaire, Rose Dyspnea Score,  
2 and Patient Health Questionnaire) that were based on expert consensus alone without active  
3 input from patients.<sup>40</sup> These standard instruments may not be meaningful to all patients as they  
4 do not capture all relevant aspects of outcomes after treatment.<sup>41</sup> Outcomes are an important  
5 determinant of treatment satisfaction, and the use of patient-defined outcomes has the unique  
6 advantage of improving both patient satisfaction and adherence to treatment.

7 There is no universal agreement on the definition of disability in cardiovascular research.<sup>11</sup>  
8 Prospective studies using clinician-derived instruments are often limited by small sample size  
9 and short follow-up durations within a single center setting. In the present study, we used a novel  
10 and versatile definition of disability based on patient preferences, which is adaptable to both  
11 prospective trials and large retrospective cohorts. Knowledge generated from this broad  
12 epidemiologic study will inform areas of focus for practice-changing research in the future.

### 14 ***Disability After Cardiac Surgery***

15 CABG is an advancing field where operative mortality has steadily declined over the  
16 years.<sup>42</sup> This, together with the younger age of presentation for CABG, could explain the lower  
17 observed rates of disability after this procedure as compared to complex CABG/multiple valve  
18 procedures, which are often performed on older and frailer patients. Complex surgery is  
19 associated with greater physiologic stresses such as fluid and electrolyte shifts, prolonged bypass  
20 durations, and a higher likelihood of exposure to low cardiac output, hypotension, end organ  
21 injury and death.<sup>43</sup>

22 To date, disability after cardiac surgery has been reported in the form of health-related  
23 quality of life (QoL), using instruments such as the SF-36, in several small observational studies.

1  
2  
3 1 In a single center study of 112 patients, patients reported higher than normative scores in  
4  
5 2 subscales of social functioning, role physical and role emotional; and lower scores in physical  
6  
7 3 function, bodily pain, general health, vitality social function and mental health; at one year after  
8  
9 4 CABG.<sup>44</sup> In a study of 534 consecutive cardiac surgery patients over the age of 75 years, mean  
10  
11 5 reported QoL improved at 6 months postoperatively as compared to baseline.<sup>45</sup> In a study of 154  
12  
13 6 nonagenarians who underwent CABG and/or valve procedures, 83% of the survivors reported an  
14  
15 7 improvement in QoL and 4% a decline in QoL, one year after surgery.<sup>46</sup> Our findings  
16  
17 8 demonstrate that the incidence of patient-defined disability may in fact be greater than previously  
18  
19 9 described by traditional instruments. Moreover, we were able to describe the population-based  
20  
21 10 incidence of disability by type of surgery and across a wider patient age range. We found that the  
22  
23 11 burden of disability was higher than death after routine procedures such as isolated CABG and  
24  
25 12 single valve surgery, and these findings were driven mostly by recurrent hospital admissions,  
26  
27 13 followed by stroke, especially in those with HF, renal dysfunction, alcoholism, dementia and  
28  
29 14 depression. As patients' ability to make informed decisions is often influenced by the emotional  
30  
31 15 and logistical repercussions of their disease diagnosis as well as limitations in health literacy,  
32  
33 16 patients with these high-risk features should be the focus of informed perioperative counseling  
34  
35 17 and undergo formal heart team evaluation regarding the risks and benefits of alternative  
36  
37 18 treatment strategies.  
38  
39  
40  
41  
42  
43  
44  
45  
46

## 47 ***Limitations***

48  
49 21 This study has several limitations. *Firstly*, data pertaining to stroke severity is unavailable  
50  
51 22 in the databases used. As some stroke patients experience full functional recovery, our findings  
52  
53 23 may have over-estimated the burden of stroke-related disability. *Secondly*, our definition of  
54  
55  
56  
57  
58  
59  
60

1 disability was based solely on patient perceptions and values. Further studies could aim to  
2 additionally elicit feedback from family members and caregivers to co-define outcomes, with  
3 input and guidance from clinicians. *Lastly*, cohort studies are by nature subjected to residual  
4 confounding.

## 6 **CONCLUSIONS**

7 We studied the procedure-specific incidence of a patient-defined disability outcome in a  
8 large cohort of cardiac surgical patients. We found disability to be a more frequent complication  
9 than death in the year after isolated CABG and single valve surgeries. In addition, patients who  
10 undergo combined CABG/multiple valve surgery, and those who have a history of HF, baseline  
11 creatinine  $\geq 180$   $\mu\text{mol/L}$ , alcoholism, dementia and depression are at the greatest risk for  
12 developing disability. Future research should be dedicated to personalized disability risk  
13 prediction to better inform the joint therapeutic decision-making process and in doing so, to  
14 improve the efficiency and effectiveness of health care delivery as well as patient satisfaction.

1  
2  
3 1 **Acknowledgements:** This study is supported by the Institute for Clinical Evaluative Sciences  
4  
5 2 (ICES), which is funded by an annual grant from the Ontario Ministry of Health and Long-Term  
6  
7 3 Care (MOHLTC). The authors acknowledge that the clinical registry data used in this analysis is  
8  
9 4 from participating hospitals through CorHealth Ontario, which serves as an advisory body to the  
10  
11 5 MOHLTC, is funded by the MOHLTC, and is dedicated to improving the quality, efficiency,  
12  
13 6 access and equity in the delivery of the continuum of adult cardiac and stroke care in Ontario,  
14  
15 7 Canada. The authors also acknowledge the usage of data compiled and provided by the Canadian  
16  
17 8 Institute for Health Information. These datasets were linked using unique encoded identifiers and  
18  
19 9 analyzed at ICES. The analyses, conclusions, opinions and statements expressed in the  
20  
21 10 manuscript are those of the authors, and do not necessarily reflect those of the above agencies.  
22  
23  
24  
25  
26  
27  
28  
29  
30  
31  
32  
33  
34  
35  
36  
37  
38  
39  
40  
41  
42  
43  
44  
45  
46  
47  
48  
49  
50  
51  
52  
53  
54  
55  
56  
57  
58  
59  
60

1  
2  
3 **1 REFERENCES**  
4

- 5  
6 2 1. Kang HC and Chung MY. Images in clinical medicine. Peripheral artery disease. *The*  
7 3 *New England journal of medicine*. 2007;357:e19.  
8 4 2. Favaloro RG. Critical Analysis of Coronary Artery Bypass Graft Surgery: A 30-Year  
9 5 Journey. *Journal of the American College of Cardiology*. 1998;31:1B-63B.  
10 6 3. Karim MN, Reid CM, Huq M, Brilleman SL, Cochrane A, Tran L and Billah B.  
11 7 Predicting long-term survival after coronary artery bypass graft surgery. *Interactive*  
12 8 *Cardiovascular and Thoracic Surgery*. 2018;26:257-263.  
13 9 4. Baillot RG, Joannisse DR, Stevens LM, Doyle DP, Dionne B and Lellouche F. Recent  
14 10 evolution in demographic and clinical characteristics and in-hospital morbidity in patients  
15 11 undergoing coronary surgery. *Canadian journal of surgery Journal canadien de chirurgie*.  
16 12 2009;52:394-400.  
17 13 5. Myles PS. Meaningful outcome measures in cardiac surgery. *J Extra Corpor Technol*.  
18 14 2014;46:23-7.  
19 15 6. Chalmers I and Clarke M. Outcomes that matter to patients in tombstone trials. *Lancet*.  
20 16 2001;358:1649.  
21 17 7. Selby JV, Beal AC and Frank L. The Patient-Centered Outcomes Research Institute  
22 18 (PCORI) national priorities for research and initial research agenda. *Jama*. 2012;307:1583-4.  
23 19 8. Rahimi K, Malhotra A, Banning AP and Jenkinson C. Outcome selection and role of  
24 20 patient reported outcomes in contemporary cardiovascular trials: systematic review. *BMJ*.  
25 21 2010;341:c5707.  
26 22 9. Mulley AG. Inconvenient truths about supplier induced demand and unwarranted  
27 23 variation in medical practice. *BMJ*. 2009;339:b4073.  
28 24 10. Caine N, Harrison SC, Sharples LD and Wallwork J. Prospective study of quality of life  
29 25 before and after coronary artery bypass grafting. *BMJ*. 1991;302:511-6.  
30 26 11. Wenger NK, Froelicher ES, Smith LK, Ades PA, Berra K, Blumenthal JA, Certo CM,  
31 27 Dattilo AM, Davis D, DeBusk RF and et al. Cardiac rehabilitation as secondary prevention.  
32 28 Agency for Health Care Policy and Research and National Heart, Lung, and Blood Institute. *Clin*  
33 29 *Pract Guidel Quick Ref Guide Clin*. 1995:1-23.  
34 30 12. Chocron S, Etievent JP, Viel JF, Dussaucy A, Clement F, Alwan K, Neidhardt M and  
35 31 Schipman N. Prospective study of quality of life before and after open heart operations. *Ann*  
36 32 *Thorac Surg*. 1996;61:153-7.  
37 33 13. Siminoff LA. Incorporating patient and family preferences into evidence-based medicine.  
38 34 *BMC medical informatics and decision making*. 2013;13 Suppl 3:S6.  
39 35 14. Bensing J. Bridging the gap. The separate worlds of evidence-based medicine and  
40 36 patient-centered medicine. *Patient Educ Couns*. 2000;39:17-25.  
41 37 15. Torgerson DJ and Sibbald B. Understanding controlled trials. What is a patient  
42 38 preference trial? *BMJ*. 1998;316:360.  
43 39 16. Sun L.Y. TJV, Lee D.S., Beanlands R.S., Ruel M., Austin P.C., Bader Eddeen A., Liu  
44 40 P.P. Disability-Free Survival After Coronary Artery Bypass Grafting in Women and Men with  
45 41 Heart Failure. *BMJ Open Heart*. 2018;5:e000911.  
46 42 17. Victor JC, Monto AS, Surdina TY, Suleimenova SZ, Vaughan G, Nainan OV, Favorov  
47 43 MO, Margolis HS and Bell BP. Hepatitis A vaccine versus immune globulin for postexposure  
48 44 prophylaxis. *The New England journal of medicine*. 2007;357:1685-94.  
49  
50  
51  
52  
53  
54  
55  
56  
57  
58  
59  
60

- 1 18. Tu JV, Ko DT, Guo H, Richards JA, Walton N, Natarajan MK, Wijeyesundera HC, So D,  
2 Latter DA, Feindel CM, Kingsbury K, Cohen EA and Cardiac Care Network of Ontario's  
3 Variations in Revascularization Practice in Ontario Working G. Determinants of variations in  
4 coronary revascularization practices. *CMAJ*. 2012;184:179-86.
- 5 19. Tu K, Campbell NRC, Chen ZL, Cauch-Dudek KJ and McAlister FA. Accuracy of  
6 administrative databases in identifying patients with hypertension. *Open Medicine*. 2007;1.
- 7 20. Juurlink D, Preya C, Croxford R, Chong A, Austin P, Tu J and Laupacis A. *Canadian  
8 Institute for Health Information Discharge Abstract Database: A Validation Study. ICES  
9 Investigative Report*. Toronto, ON: Institute for Clinical Evaluative Sciences; 2006.
- 10 21. Hux JE, Ivis F, Flintoft V and Bica A. Diabetes in Ontario: determination of prevalence  
11 and incidence using a validated administrative data algorithm. *Diabetes Care*. 2002;25.
- 12 22. Austin PC, Daly PA and Tu JV. A multicenter study of the coding accuracy of hospital  
13 discharge administrative data for patients admitted to cardiac care units in Ontario. *Am Heart J*.  
14 2002;144.
- 15 23. Quan H, Sundararajan V, Halfon P, Fong A, Burnand B, Luthi JC, Saunders LD, Beck  
16 CA, Feasby TE and Ghali WA. Coding algorithms for defining comorbidities in ICD-9-CM and  
17 ICD-10 administrative data. *Med Care*. 2005;43.
- 18 24. Gershon AS, Wang C, Guan J, Vasilevska-Ristovska J, Cicutto L and To T. Identifying  
19 individuals with physician diagnosed COPD in health administrative databases. *COPD*. 2009;6.
- 20 25. Schultz SE, Rothwell DM, Chen Z and Tu K. Identifying cases of congestive heart failure  
21 from administrative data: a validation study using primary care patient records. *Chronic Dis Inj  
22 Can*. 2013;33:160-6.
- 23 26. Johnston A, Mesana TG, Lee DS, Eddeen AB and Sun LY. Sex Differences in Long-  
24 Term Survival After Major Cardiac Surgery: A Population-Based Cohort Study. *J Am Heart  
25 Assoc*. 2019;8:e013260.
- 26 27. du Plessis V, Beshiri R, Bollman RD and Clemeson H. *Definitions of "rural". Agriculture  
27 and Rural Working Paper Series, No. 61*. Ottawa, ON: Statistics Canada; 2002.
- 28 28. Sun LYT, J. V.; Bader Eddeen, A.; Liu, P.P. Prevalence and Long-Term Survival After  
29 Coronary Artery Bypass Grafting in Men and Women with Heart Failure and Preserved vs  
30 Reduced Ejection Fraction. *JAHA*. 2018;7.
- 31 29. Tran DTT, Tu JV, Dupuis JY, Bader Eddeen A and Sun LY. Association of Frailty and  
32 Long-Term Survival in Patients Undergoing Coronary Artery Bypass Grafting. *J Am Heart  
33 Assoc*. 2018;7.
- 34 30. Lieberman R AC, Weiner J. Development and evaluation of the Johns Hopkins  
35 University Risk Adjustment Models for Medicare+ Choice Plan Payment. 2003.
- 36 31. Sternberg SA, Bentur N, Abrams C, Spalter T, Karpati T, Lemberger J and Heymann  
37 AD. Identifying frail older people using predictive modeling. *Am J Manag Care*. 2012;18:e392-  
38 7.
- 39 32. The Johns Hopkins Adjusted Clinical Groups Technical Reference Guide, version 9.0.  
40 2009.
- 41 33. Bronskill S CM, Costa A, et al. Aging in Ontario: An ICES Chartbook of Health Services  
42 Use by Older Adults - a Technical Report. 2010.
- 43 34. Bronskill S CX, Gruneir A, Ho M. Health system use by frail Ontario seniors: an in-depth  
44 examination of four vulnerable cohorts. 2011.



- 1  
2  
3  
4  
5  
6  
7  
8  
9  
10  
11  
12  
13  
14  
15  
16  
17  
18  
19  
20  
21  
22  
23  
24  
25  
26  
27  
28  
29  
30  
31  
32  
33  
34  
35  
36  
37  
38  
39  
40  
41  
42  
43  
44  
45  
46  
47  
48  
49  
50  
51  
52  
53  
54  
55  
56  
57  
58  
59  
60
- 1 35. Tu K, Wang M, Young J, Green D, Ivers NM, Butt D, Jaakkimainen L and Kapral MK. Validity of administrative data for identifying patients who have had a stroke or transient ischemic attack using EMRALD as a reference standard. *Can J Cardiol.* 2013;29:1388-94.
  - 2 36. Frank L, Basch E, Selby JV and Patient-Centered Outcomes Research I. The PCORI perspective on patient-centered outcomes research. *Jama.* 2014;312:1513-4.
  - 3 37. Macario A, Weinger M, Carney S and Kim A. Which clinical anesthesia outcomes are important to avoid? The perspective of patients. *Anesth Analg.* 1999;89:652-8.
  - 4 38. Eberhart LH, Morin AM, Wulf H and Geldner G. Patient preferences for immediate postoperative recovery. *British journal of anaesthesia.* 2002;89:760-1.
  - 5 39. Rashid S and Bray P. Relative value to surgical patients and anesthesia providers of selected anesthesia related outcomes. *BMC medical informatics and decision making.* 2003;3:3.
  - 6 40. McNamara RL, Spatz ES, Kelley TA, Stowell CJ, Beltrame J, Heidenreich P, Tresserras R, Jernberg T, Chua T, Morgan L, Panigrahi B, Rosas Ruiz A, Rumsfeld JS, Sadwin L, Schoeberl M, Shahian D, Weston C, Yeh R and Lewin J. Standardized Outcome Measurement for Patients With Coronary Artery Disease: Consensus From the International Consortium for Health Outcomes Measurement (ICHOM). *J Am Heart Assoc.* 2015;4.
  - 7 41. Revicki DA. Patient assessment of treatment satisfaction: methods and practical issues. *Gut.* 2004;53 Suppl 4:iv40-4.
  - 8 42. Ferguson TB, Jr., Hammill BG, Peterson ED, DeLong ER, Grover FL and Committee STSND. A decade of change--risk profiles and outcomes for isolated coronary artery bypass grafting procedures, 1990-1999: a report from the STS National Database Committee and the Duke Clinical Research Institute. Society of Thoracic Surgeons. *Ann Thorac Surg.* 2002;73:480-9; discussion 489-90.
  - 9 43. Sun L.Y. CAM, Farkouh M., Van Diepen S., Weinberger J., Bourke M., Ruel M. Defining a Perioperative Hypotension Threshold in Association with Stroke in Cardiac Surgery. *Anesthesiology.* 2018;In press.
  - 10 44. Taghipour HR, Naseri MH, Safiarian R, Dadjoo Y, Pishgoo B, Mohebbi HA, Daftari Besheli L, Malekzadeh M and Kabir A. Quality of life one year after coronary artery bypass graft surgery. *Iran Red Crescent Med J.* 2011;13:171-7.
  - 11 45. Gjeilo KH, Wahba A, Klepstad P, Lydersen S and Stenseth R. Survival and quality of life in an elderly cardiac surgery population: 5-year follow-up. *European journal of cardio-thoracic surgery : official journal of the European Association for Cardio-thoracic Surgery.* 2013;44:e182-8.
  - 12 46. Caceres M, Cheng W, De Robertis M, Mirocha JM, Czer L, Esmailian F, Khoynzhad A, Ramzy D, Kass R and Trento A. Survival and quality of life for nonagenarians after cardiac surgery. *Ann Thorac Surg.* 2013;95:1598-602.

1  
2  
3 **1 FIGURES**  
4  
5  
6  
7  
8  
9  
10  
11  
12  
13  
14  
15  
16  
17  
18  
19  
20  
21  
22  
23  
24  
25  
26  
27  
28  
29  
30  
31  
32  
33  
34  
35  
36  
37  
38  
39  
40  
41  
42  
43  
44  
45  
46  
47  
48  
49  
50  
51  
52  
53  
54  
55  
56  
57  
58  
59  
60

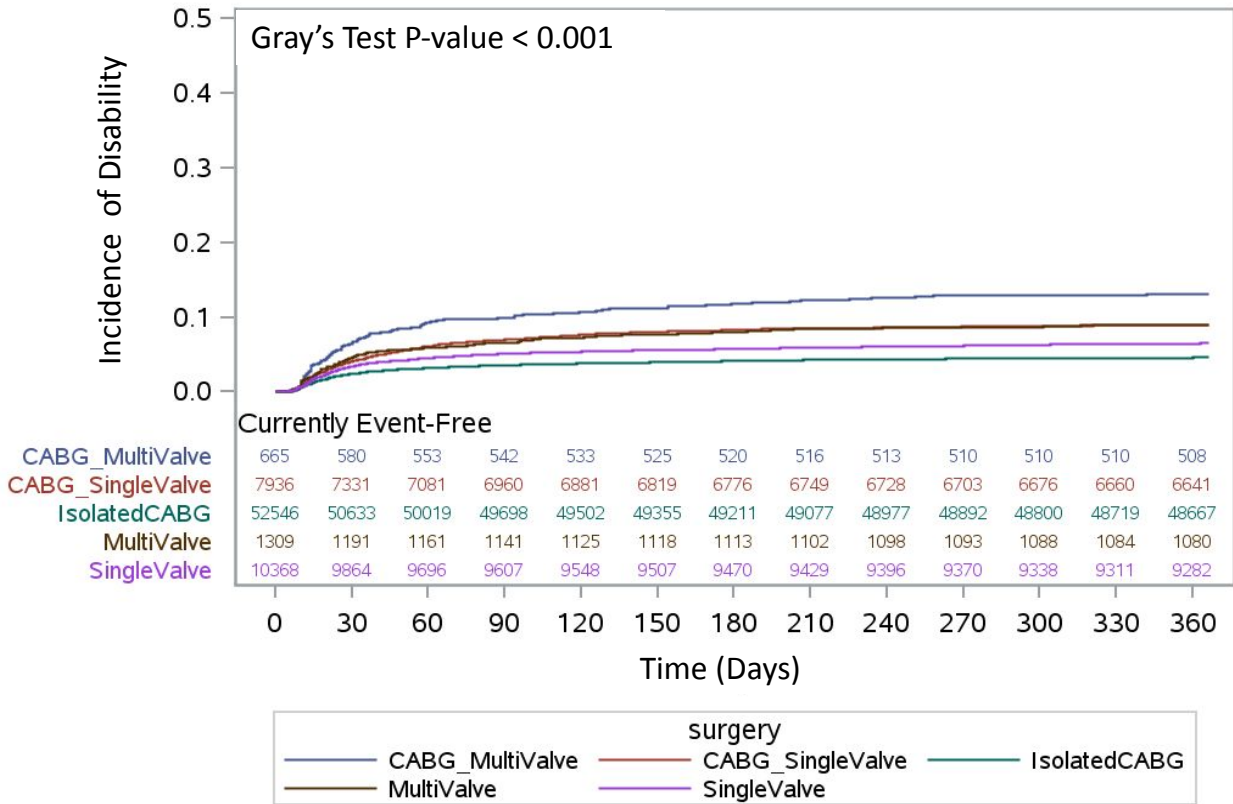

15 **Figure 1.** Cumulative incidence of disability within one year after cardiac surgery.

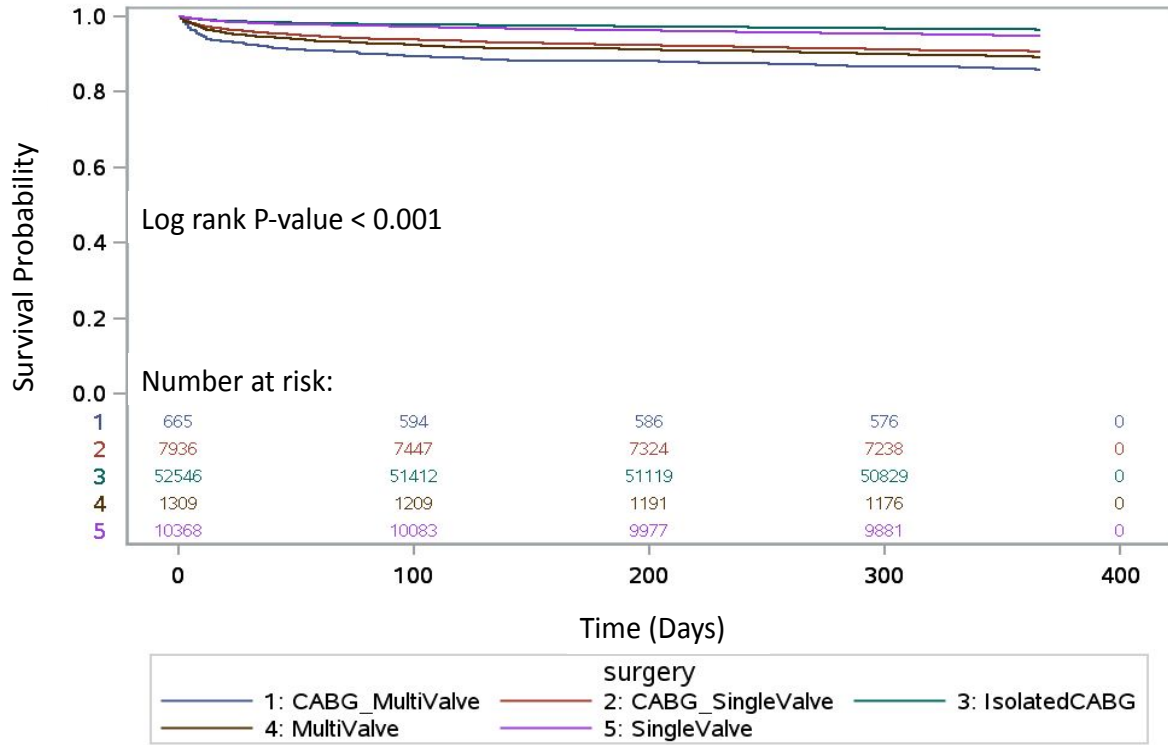

**Figure 2.** Estimated survival within one year after cardiac surgery.

1 **Table 1. Baseline characteristics, stratified by type of surgery**

| Variable          | No. (%) of patients* |               |              |             |               |                  | P value |
|-------------------|----------------------|---------------|--------------|-------------|---------------|------------------|---------|
|                   | Overall              | Isolated      | Single       | Multiple    | CABG +        | CABG +           |         |
|                   | population           | CABG          | valve†       | valves‡     | single valve† | multiple valves‡ |         |
|                   | (N=72 824)           | (N= 52 546)   | (N= 10 368)  | (N= 1 309)  | (N= 7 936)    | (N= 665)         |         |
| Age, mean ± SD, y | 67.0 ± 10.2          | 65.9 ± 9.8    | 67.5 ± 11.2  | 68.3 ± 11.4 | 72.6 ± 9.0    | 72.5 ± 9.1       | <0.001  |
| 40-64             | 28 941 (39.7)        | 22 925 (43.6) | 3 969 (38.3) | 458 (35.0)  | 1 460 (18.4)  | 129 (19.4)       | <0.001  |
| 65-74             | 25 229 (34.6)        | 18 626 (35.4) | 3 197 (30.8) | 395 (30.2)  | 2 795 (35.2)  | 216 (32.5)       |         |
| 75-84             | 16 806 (23.1)        | 10 220 (19.4) | 2 801 (27.0) | 388 (29.6)  | 3 128 (39.4)  | 269 (40.5)       |         |
| ≥85               | 1 848 (2.5)          | 775 (1.5)     | 401 (3.9)    | 68 (5.2)    | 553 (7.0)     | 51 (7.7)         |         |
| Rural Residence   | 11 763 (16.2)        | 8 204 (15.6)  | 1 756 (16.9) | 203 (15.5)  | 1 457 (18.4)  | 143 (21.5)       |         |
| Income quintile   |                      |               |              |             |               |                  |         |
| 1 (lowest)        | 13 448 (18.5)        | 10 003 (19.0) | 1 728 (16.7) | 245 (18.7)  | 1 370 (17.3)  | 102 (15.3)       | <0.001  |
| 2                 | 14 696 (20.2)        | 10 724 (20.4) | 1 959 (18.9) | 257 (19.6)  | 1 608 (20.3)  | 148 (22.3)       |         |
| 3                 | 14 759 (20.3)        | 10 627 (20.2) | 2 117 (20.4) | 249 (19.0)  | 1 609 (20.3)  | 157 (23.6)       |         |

|                     |               |               |              |              |              |            |        |
|---------------------|---------------|---------------|--------------|--------------|--------------|------------|--------|
| 4                   | 15 017 (20.6) | 10 714 (20.4) | 2 214 (21.4) | 257 (19.6)   | 1 705 (21.5) | 127 (19.1) |        |
| 5 (highest)         | 14 532 (20.0) | 10 184 (19.4) | 2 310 (22.3) | 292 (22.3)   | 1 617 (20.4) | 129 (19.4) |        |
| Missing             | 372 (0.5)     | 294 (0.6)     | 40 (0.4)     | 9 (0.7)      | 27 (0.3)     | ≤5         |        |
| Hypertension        | 62 852 (86.3) | 46 111 (87.8) | 7 954 (76.7) | 1 007 (76.9) | 7 185 (90.5) | 595 (89.5) | <0.001 |
| Atrial fibrillation | 5 165 (7.1)   | 2 373 (4.5)   | 1 343 (13.0) | 304 (23.2)   | 990 (12.5)   | 155 (23.3) | <0.001 |
| Recent MI           | 22 952 (31.5) | 20 684 (39.4) | 422 (4.1)    | 55 (4.2)     | 1 659 (20.9) | 132 (19.8) | <0.001 |
| Remote MI           | 11 605 (15.9) | 9 432 (17.9)  | 679 (6.5)    | 91 (7.0)     | 1 295 (16.3) | 108 (16.2) | <0.001 |
| Previous PCI        | 10 532 (14.5) | 8 773 (16.7)  | 617 (6.0)    | 70 (5.3)     | 1 004 (12.7) | 68 (10.2)  | <0.001 |
| Heart failure       | 19 847 (27.3) | 10 126 (19.3) | 4 729 (45.6) | 848 (64.8)   | 3 714 (46.8) | 430 (64.7) | <0.001 |
| LVEF                |               |               |              |              |              |            |        |
| ≥50%                | 48 185 (66.2) | 32 237 (61.4) | 8 843 (85.3) | 1 040 (79.4) | 5 630 (70.9) | 435 (65.4) |        |
| 35-50%              | 15 448 (21.2) | 12 762 (24.3) | 967 (9.3)    | 176 (13.4)   | 1 398 (17.6) | 145 (21.8) |        |
| 20-35%              | 6 044 (8.3)   | 4 911 (9.3)   | 346 (3.3)    | 67 (5.1)     | 654 (8.2)    | 66 (9.9)   |        |
| <20%                | 1 113 (1.5)   | 905 (1.7)     | 43 (0.4)     | 13 (1.0)     | 139 (1.8)    | 13 (2.0)   |        |
| Missing             | 2 034 (2.8)   | 1 731 (3.3)   | 169 (1.6)    | 13 (1.0)     | 115 (1.4)    | 6 (0.9)    | <0.001 |
| Cerebrovascular     | 7 420 (10.2)  | 5 132 (9.8)   | 970 (9.4)    | 163 (12.5)   | 1 073 (13.5) | 82 (12.3)  | <0.001 |

1  
2  
3  
4  
5  
6  
7  
8  
9  
10  
11  
12  
13  
14  
15  
16  
17  
18  
19  
20  
21  
22  
23  
24  
25  
26  
27  
28  
29  
30  
31  
32  
33  
34  
35  
36  
37  
38  
39  
40  
41  
42  
43  
44  
45  
46  
47

---

|                              |               |               |              |              |              |            |        |
|------------------------------|---------------|---------------|--------------|--------------|--------------|------------|--------|
| disease                      |               |               |              |              |              |            |        |
| Peripheral arterial disease  | 9 139 (12.5)  | 6 424 (12.2)  | 1 079 (10.4) | 139 (10.6)   | 1 389 (17.5) | 108 (16.2) | <0.001 |
| COPD or asthma               | 21 419 (29.4) | 14 702 (28.0) | 3 301 (31.8) | 439 (33.5)   | 2 726 (34.3) | 251 (37.7) | <0.001 |
| Diabetes mellitus            | 32 812 (45.1) | 25 267 (48.1) | 3 218 (31.0) | 422 (32.2)   | 3 639 (45.9) | 266 (40.0) | <0.001 |
| Morbid obesity               | 28 391 (39.0) | 20 490 (39.0) | 3 951 (38.1) | 563 (43.0)   | 3 106 (39.1) | 281 (42.3) | 0.004  |
| Hypothyroidism               | 1 419 (1.9)   | 969 (1.8)     | 206 (2.0)    | 40 (3.1)     | 186 (2.3)    | 18 (2.7)   | <0.001 |
| Liver disease                | 633 (0.9)     | 351 (0.7)     | 153 (1.5)    | 37 (2.8)     | 81 (1.0)     | 11 (1.7)   | <0.001 |
| Anemia                       | 7 347 (10.1)  | 4 918 (9.4)   | 977 (9.4)    | 203 (15.5)   | 1 113 (14.0) | 136 (20.5) | <0.001 |
| Venous thromboembolism       | 288 (0.4)     | 173 (0.3)     | 57 (0.5)     | 10 (0.8)     | 46 (0.6)     | ≤5         | <0.001 |
| Dialysis                     | 1 531 (2.1)   | 1 047 (2.0)   | 195 (1.9)    | 34 (2.6)     | 233 (2.9)    | 22 (3.3)   | <0.001 |
| Baseline Creatinine (μmol/L) |               |               |              |              |              |            |        |
| 120-179                      | 6 635 (9.1)   | 4 487 (8.5)   | 855 (8.2)    | 163 (12.5)   | 1 037 (13.1) | 93 (14.0)  | <0.001 |
| <120                         | 60 190 (82.7) | 43 934 (83.6) | 8 538 (82.3) | 1 038 (79.3) | 6 158 (77.6) | 522 (78.5) |        |

---

|                                 |               |              |              |            |              |            |        |
|---------------------------------|---------------|--------------|--------------|------------|--------------|------------|--------|
| ≥ 180                           | 2 435 (3.3)   | 1 698 (3.2)  | 261 (2.5)    | 63 (4.8)   | 381 (4.8)    | 32 (4.8)   |        |
| Missing                         | 3 564 (4.9)   | 2 427 (4.6)  | 714 (6.9)    | 45 (3.4)   | 360 (4.5)    | 18 (2.7)   |        |
| Chronic renal disease           | 3 133 (4.3)   | 2 109 (4.0)  | 399 (3.8)    | 66 (5.0)   | 516 (6.5)    | 43 (6.5)   | <0.001 |
| Dementia                        | 176 (0.2)     | 98 (0.2)     | 27 (0.3)     | ≤5         | 41 (0.5)     | 6 (0.9)    | <0.001 |
| Depression                      | 1 089 (1.5)   | 733 (1.4)    | 157 (1.5)    | 37 (2.8)   | 149 (1.9)    | 13 (2.0)   | <0.001 |
| Psychosis                       | 161 (0.2)     | 102 (0.2)    | 33 (0.3)     | 6 (0.5)    | 17 (0.2)     | ≤5         | 0.025  |
| Primary tumor                   | 3 770 (5.2)   | 2 486 (4.7)  | 601 (5.8)    | 96 (7.3)   | 539 (6.8)    | 48 (7.2)   | <0.001 |
| Metastatic cancer               | 375 (0.5)     | 248 (0.5)    | 72 (0.7)     | 10 (0.8)   | 40 (0.5)     | ≤5         | 0.03   |
| Charlson score,<br>median (IQR) | 1 (0-3)       | 2 (0-3)      | 1 (0-2)      | 1 (0-2)    | 2 (0-3)      | 2 (1-3)    | <0.001 |
| Frailty <sup>§</sup>            | 11 685 (16.0) | 8 623 (16.4) | 1 204 (11.6) | 213 (16.3) | 1 491 (18.8) | 154 (23.2) | <0.001 |

1 \* Unless otherwise stated †Mitral, aortic or tricuspid valve surgery ‡Mitral, aortic or tricuspid valve surgery

2 §According to the Johns Hopkins Adjusted Clinical Groups frailty-defining diagnoses indicator<sup>29-34</sup>

3 Abbreviations: CABG = coronary artery bypass grafting; COPD = chronic obstructive pulmonary disease; LVEF = left ventricular  
4 ejection fraction; MI = myocardial infarction; PCI = percutaneous coronary intervention; IQR = interquartile range

1  
2  
3 **Table 2.** Event rates within 1 year following cardiac surgery.  
4

| Event, n (%)                         | CABG<br>(n=52,546) | Single Valve<br>(n=10,368) | Multiple<br>Valves<br>(n=1,309) | CABG +<br>Single Valve<br>(n=7,936) | CABG +<br>Multiple<br>Valves<br>(n=665) | P-Value |
|--------------------------------------|--------------------|----------------------------|---------------------------------|-------------------------------------|-----------------------------------------|---------|
| Disability                           | 2,431 (4.6)        | 677 (6.5)                  | 118 (9.0)                       | 718 (9.1)                           | 87 (13.1)                               | <0.001  |
| Death                                | 1,839 (3.5)        | 540 (5.2)                  | 140 (10.7)                      | 734 (9.2)                           | 94 (14.1)                               | <0.001  |
| Stroke                               | 808 (1.5)          | 258 (2.5)                  | 48 (3.7)                        | 280 (3.5)                           | 38 (5.7)                                | <0.001  |
| ≥ 3 non-elective<br>hospitalizations | 1,454 (2.8)        | 367 (3.5)                  | 57 (4.4)                        | 373 (4.7)                           | 41 (6.2)                                | <0.001  |
| Long-term care<br>admission          | 342 (0.7)          | 102 (1.0)                  | 20 (1.5)                        | 122 (1.5)                           | 12 (1.8)                                | <0.001  |

Abbreviations: CABG = coronary artery bypass grafting

2



1 **Table 3.** Multivariable predictors of disability at one-year after major cardiac surgery.

| Variable                             | HR (95% CI)      | P-Value   |
|--------------------------------------|------------------|-----------|
| <b>Age</b>                           | 1.03 (1.02-1.03) | <0.001    |
| <b>Female</b>                        | 1.38 (1.28-1.48) | <0.001    |
| <b>Surgery Type</b>                  |                  |           |
| Isolated CABG                        | Reference        | Reference |
| Single Valve                         | 1.34 (1.21-1.48) | <0.001    |
| Multiple Valves                      | 1.43 (1.18-1.75) | <0.001    |
| CABG + Single Valve                  | 1.38 (1.26-1.51) | <0.001    |
| CABG + Multiple Valves               | 1.78 (1.43-2.23) | <0.001    |
| <b>Emergent Procedure</b>            | 1.40 (1.26-1.57) | <0.001    |
| <b>Rural Residence</b>               | 1.03 (0.94-1.12) | 0.55      |
| <b>Income Quintile</b>               |                  |           |
| 1 (Lowest)                           | 1.33 (1.20-1.47) | <0.001    |
| 2                                    | 1.16 (1.05-1.29) | 0.004     |
| 3                                    | 1.11 (1.00-1.23) | 0.05      |
| 4                                    | 0.99 (0.89-1.10) | 0.83      |
| 5 (Highest)                          | Reference        | Reference |
| <b>Hypertension</b>                  | 1.16 (1.03-1.31) | 0.02      |
| <b>Atrial Fibrillation</b>           | 1.25 (1.14-1.37) | <0.001    |
| <b>Heart Failure</b>                 | 1.66 (1.53-1.79) | <0.001    |
| <b>MI within 30 Days</b>             | 1.26 (1.17-1.36) | <0.001    |
| <b>Remote MI</b>                     | 1.13 (1.04-1.23) | <0.001    |
| <b>Previous PCI</b>                  | 0.94 (0.85-1.03) | 0.17      |
| <b>LVEF</b>                          |                  |           |
| < 20%                                | 1.10 (0.89-1.36) | 0.37      |
| 20-34%                               | 1.07 (0.99-1.16) | 0.10      |
| 35-49%                               | 1.00 (0.89-1.11) | 0.94      |
| ≥ 50%                                | Reference        | Reference |
| <b>Cerebrovascular Disease</b>       | 1.40 (1.29-1.53) | <0.001    |
| <b>Peripheral Arterial Disease</b>   | 1.23 (1.14-1.34) | <0.001    |
| <b>Smoker</b>                        |                  |           |
| Never                                | Reference        | Reference |
| Current                              | 1.19 (1.09-1.30) | <0.001    |
| Former                               | 1.07 (0.99-1.15) | 0.08      |
| <b>COPD/Asthma</b>                   | 1.32 (1.24-1.41) | <0.001    |
| <b>Pulmonary Circlatory Disorder</b> | 1.07 (0.91-1.24) | 0.42      |
| <b>Morbid Obesity</b>                | 0.97 (0.91-1.03) | 0.31      |

|                                                           |                  |           |
|-----------------------------------------------------------|------------------|-----------|
| <b>Diabetes</b>                                           | 1.38 (1.29-1.47) | <0.001    |
| <b>Hypothyroidism</b>                                     | 1.10 (0.93-1.31) | 0.25      |
| <b>Anemia</b>                                             | 1.39 (1.28-1.51) | <0.001    |
| <b>Baseline Creatinine (<math>\mu\text{mol/L}</math>)</b> |                  |           |
| < 120                                                     | Reference        | Reference |
| 120-179                                                   | 1.32 (1.21-1.45) | <0.001    |
| $\geq 180$                                                | 1.81 (1.57-2.08) | <0.001    |
| <b>Dialysis</b>                                           | 1.40 (1.19-1.64) | <0.001    |
| <b>Liver Disease</b>                                      | 1.33 (1.06-1.68) | 0.02      |
| <b>Alcoholism</b>                                         | 1.68 (1.39-2.03) | <0.001    |
| <b>Dementia</b>                                           | 1.59 (1.13-2.24) | 0.01      |
| <b>Depression</b>                                         | 1.66 (1.41-1.97) | <0.001    |
| <b>Psychosis</b>                                          | 1.05 (0.62-1.76) | 0.87      |
| <b>Primary Cancer</b>                                     | 1.19 (1.06-1.34) | 0.004     |
| <b>Metastatic Cancer</b>                                  | 1.47 (1.08-1.99) | 0.01      |

1

2 Abbreviations: CABG = coronary artery bypass grafting; MI = myocardial infarction; PCI =  
 3 percutaneous coronary intervention; COPD = chronic obstructive pulmonary disease; HR =  
 4 hazard ratio, CI = confidence interval

5

## Supplemental Material

Supplemental Figure 1. Cohort selection flow chart

Supplemental Figure 2. Cumulative incidence of stroke within one year after cardiac surgery.

Supplemental Figure 3. Cumulative incidence of long-term care (LTC) admissions within one year after cardiac surgery.

Supplemental Figure 4. Cumulative incidence of recurrent non-elective hospitalizations ( $\geq 3$  episodes per year) within one year after cardiac surgery.

Confidential

1  
2  
3  
4  
5  
6  
7  
8  
9  
10  
11  
12  
13  
14  
15  
16  
17  
18  
19  
20  
21  
22  
23  
24  
25  
26  
27  
28  
29  
30  
31  
32  
33  
34  
35  
36  
37  
38  
39  
40  
41  
42  
43  
44  
45  
46  
47  
48  
49  
50  
51  
52  
53  
54  
55  
56  
57  
58  
59  
60

**Supplemental Figure 1.** Cohort selection flow chart

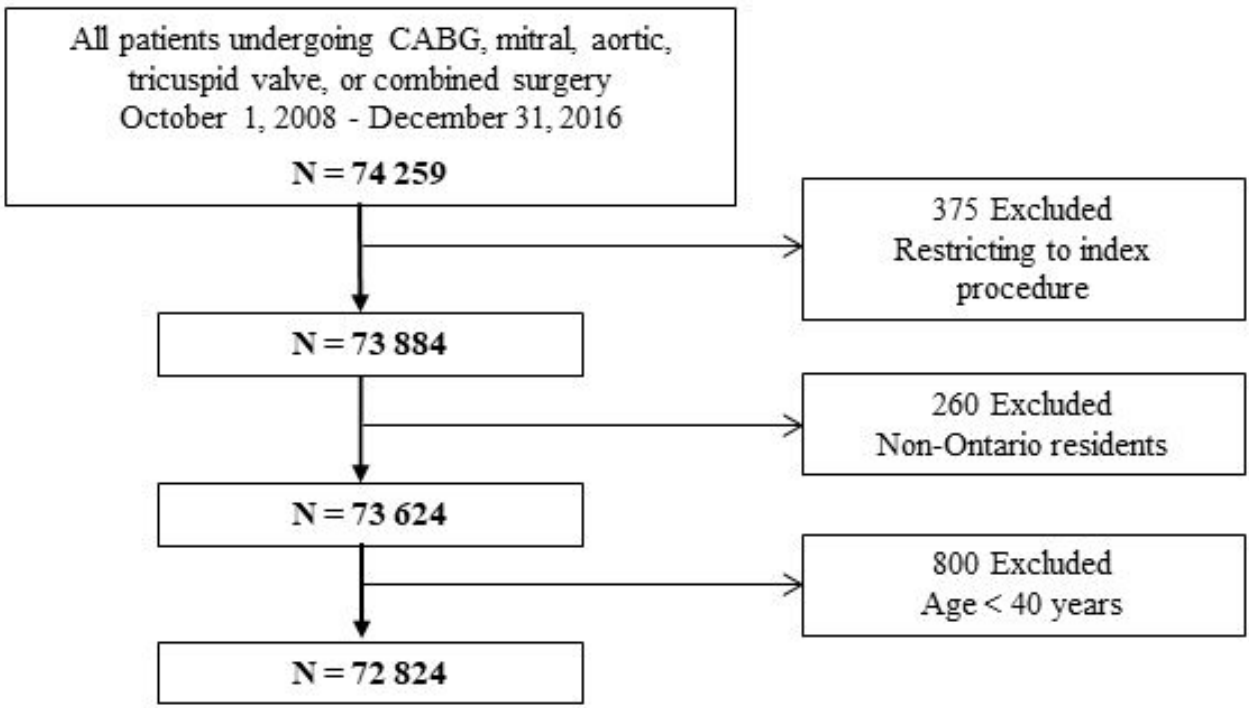

Abbreviation: CABG = coronary artery bypass surgery

Supplemental Figure 2. Cumulative incidence of stroke within one year after cardiac surgery.

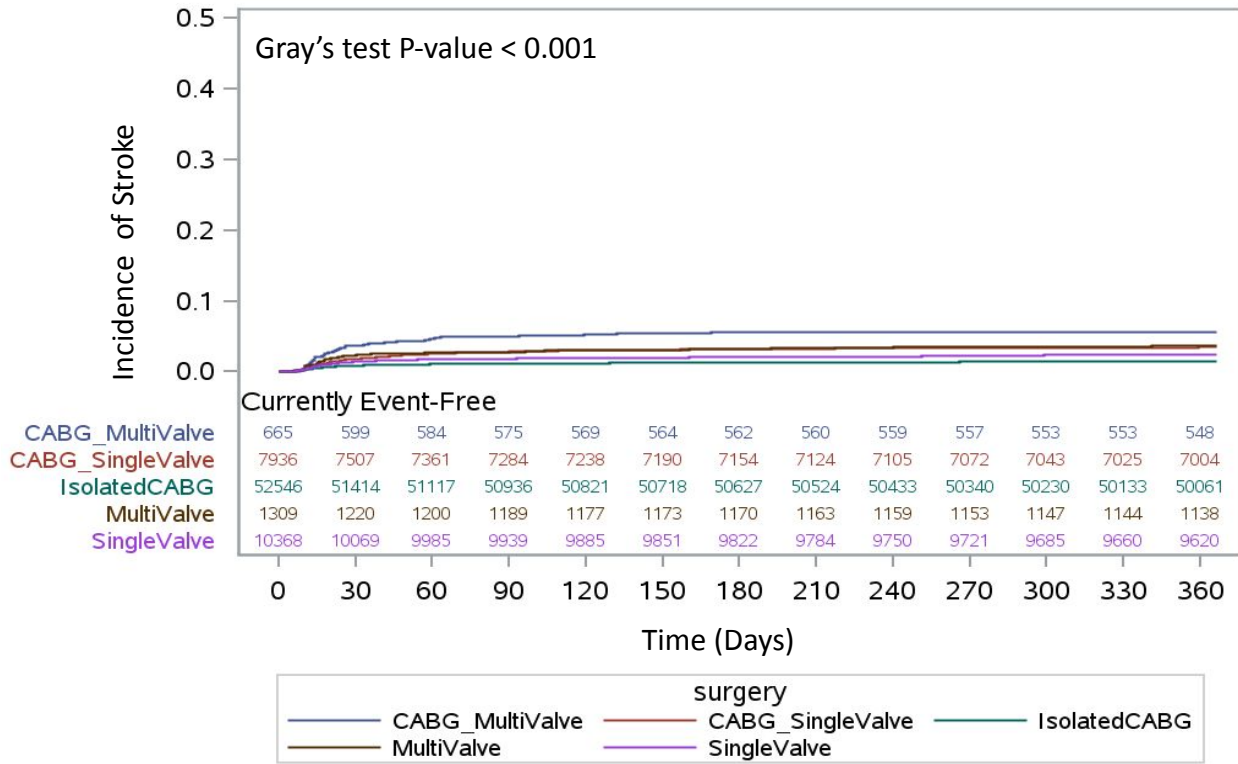

1  
2  
3  
4  
5  
6  
7  
8  
9  
10  
11  
12  
13  
14  
15  
16  
17  
18  
19  
20  
21  
22  
23  
24  
25  
26  
27  
28  
29  
30  
31  
32  
33  
34  
35  
36  
37  
38  
39  
40  
41  
42  
43  
44  
45  
46  
47  
48  
49  
50  
51  
52  
53  
54  
55  
56  
57  
58  
59  
60

**Supplemental Figure 3.** Cumulative incidence of long-term care (LTC) admissions within one year after cardiac surgery.

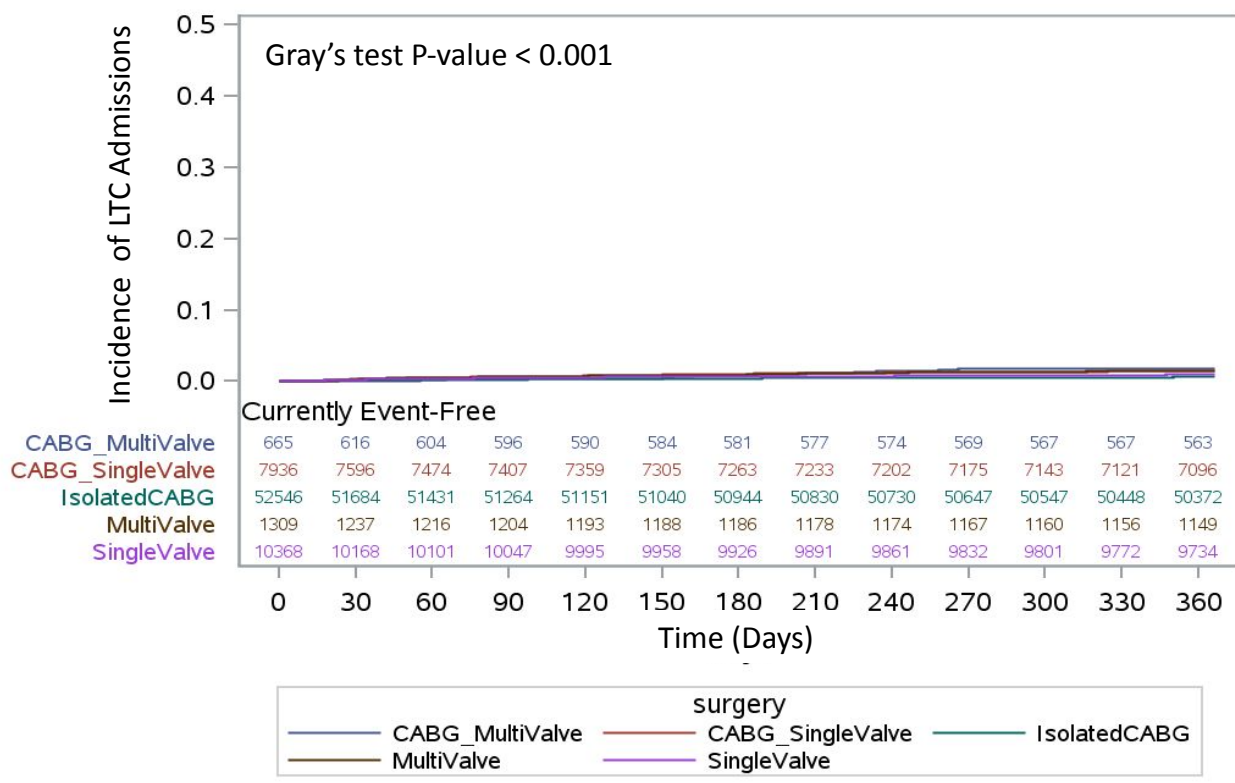

**Supplemental Figure 4.** Cumulative incidence of recurrent non-elective hospitalizations ( $\geq 3$  episodes per year) within one year after cardiac surgery.

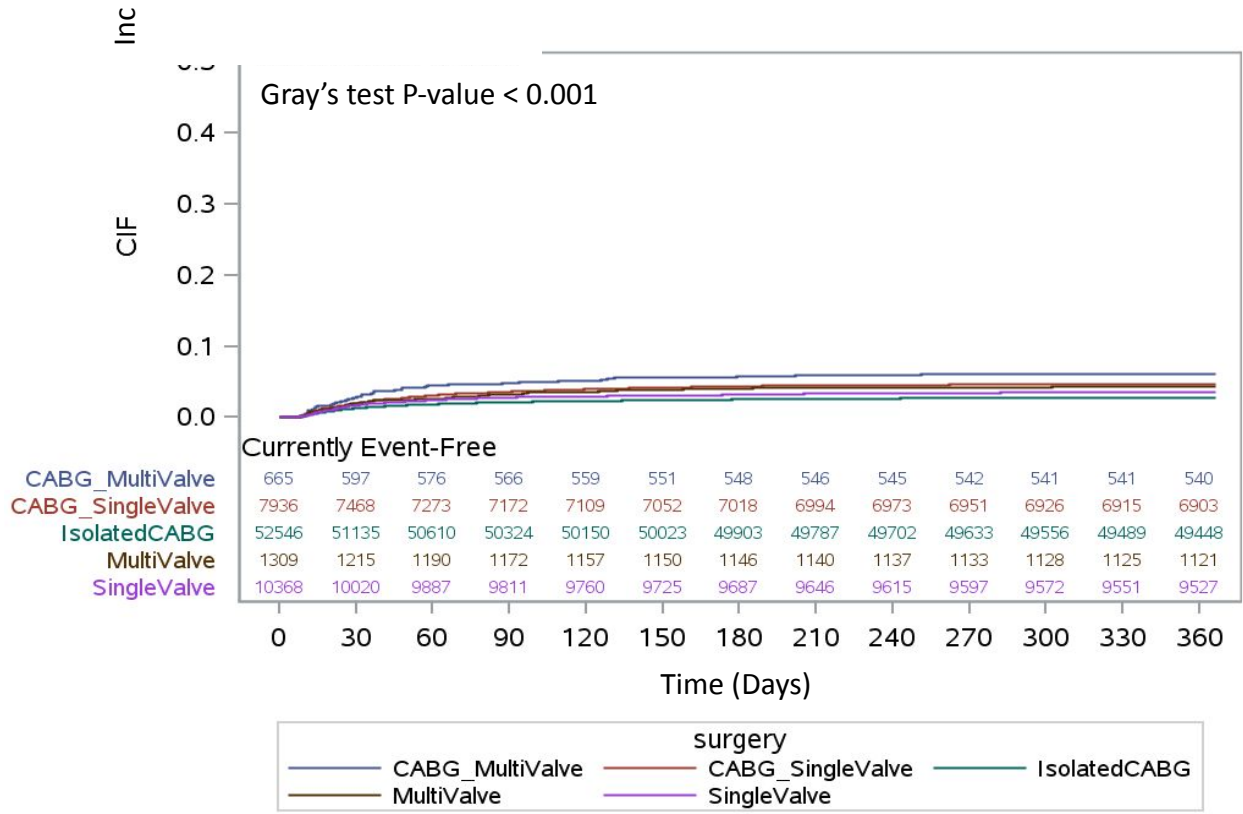

STROBE Statement—Checklist of items that should be included in reports of *cohort studies*

|                              | Item No | Recommendation                                                                                                                                                                                                                                                                                                         | Page No                                   |
|------------------------------|---------|------------------------------------------------------------------------------------------------------------------------------------------------------------------------------------------------------------------------------------------------------------------------------------------------------------------------|-------------------------------------------|
| <b>Title and abstract</b>    | 1       | (a) Indicate the study's design with a commonly used term in the title or the abstract<br>(b) Provide in the abstract an informative and balanced summary of what was done and what was found                                                                                                                          | Title page<br>1                           |
| <b>Introduction</b>          |         |                                                                                                                                                                                                                                                                                                                        |                                           |
| Background/rationale         | 2       | Explain the scientific background and rationale for the investigation being reported                                                                                                                                                                                                                                   | 2                                         |
| Objectives                   | 3       | State specific objectives, including any prespecified hypotheses                                                                                                                                                                                                                                                       | 2                                         |
| <b>Methods</b>               |         |                                                                                                                                                                                                                                                                                                                        |                                           |
| Study design                 | 4       | Present key elements of study design early in the paper                                                                                                                                                                                                                                                                | 3                                         |
| Setting                      | 5       | Describe the setting, locations, and relevant dates, including periods of recruitment, exposure, follow-up, and data collection                                                                                                                                                                                        | 3                                         |
| Participants                 | 6       | (a) Give the eligibility criteria, and the sources and methods of selection of participants. Describe methods of follow-up<br>(b) For matched studies, give matching criteria and number of exposed and unexposed                                                                                                      | 3<br>N/A                                  |
| Variables                    | 7       | Clearly define all outcomes, exposures, predictors, potential confounders, and effect modifiers. Give diagnostic criteria, if applicable                                                                                                                                                                               | 4                                         |
| Data sources/<br>measurement | 8*      | For each variable of interest, give sources of data and details of methods of assessment (measurement). Describe comparability of assessment methods if there is more than one group                                                                                                                                   | 3-4                                       |
| Bias                         | 9       | Describe any efforts to address potential sources of bias                                                                                                                                                                                                                                                              | 5-6                                       |
| Study size                   | 10      | Explain how the study size was arrived at                                                                                                                                                                                                                                                                              | 3                                         |
| Quantitative variables       | 11      | Explain how quantitative variables were handled in the analyses. If applicable, describe which groupings were chosen and why                                                                                                                                                                                           | 5-6                                       |
| Statistical methods          | 12      | (a) Describe all statistical methods, including those used to control for confounding<br>(b) Describe any methods used to examine subgroups and interactions<br>(c) Explain how missing data were addressed<br>(d) If applicable, explain how loss to follow-up was addressed<br>(e) Describe any sensitivity analyses | 5-6                                       |
| <b>Results</b>               |         |                                                                                                                                                                                                                                                                                                                        |                                           |
| Participants                 | 13*     | (a) Report numbers of individuals at each stage of study—eg numbers potentially eligible, examined for eligibility, confirmed eligible, included in the study, completing follow-up, and analysed<br>(b) Give reasons for non-participation at each stage<br>(c) Consider use of a flow diagram                        | Suppl Fig 1<br>Suppl Fig 1<br>Suppl Fig 1 |
| Descriptive data             | 14*     | (a) Give characteristics of study participants (eg demographic, clinical, social) and information on exposures and potential confounders<br>(b) Indicate number of participants with missing data for each variable of interest<br>(c) Summarise follow-up time (eg, average and total amount)                         | 7<br>Table 1<br>5                         |
| Outcome data                 | 15*     | Report numbers of outcome events or summary measures over time                                                                                                                                                                                                                                                         | Table 2; p.7                              |



|    |                          |    |                                                                                                                                                                                                              |               |
|----|--------------------------|----|--------------------------------------------------------------------------------------------------------------------------------------------------------------------------------------------------------------|---------------|
| 1  | Main results             | 16 | (a) Give unadjusted estimates and, if applicable, confounder-adjusted estimates and their precision (eg, 95% confidence interval). Make clear which confounders were adjusted for and why they were included | p. 8; Table 3 |
| 2  |                          |    | (b) Report category boundaries when continuous variables were categorized                                                                                                                                    | Table 1       |
| 3  |                          |    | (c) If relevant, consider translating estimates of relative risk into absolute risk for a meaningful time period                                                                                             | N/A           |
| 4  | Other analyses           | 17 | Report other analyses done—eg analyses of subgroups and interactions, and sensitivity analyses                                                                                                               | 6-7           |
| 5  | <b>Discussion</b>        |    |                                                                                                                                                                                                              |               |
| 6  | Key results              | 18 | Summarise key results with reference to study objectives                                                                                                                                                     | 9             |
| 7  | Limitations              | 19 | Discuss limitations of the study, taking into account sources of potential bias or imprecision. Discuss both direction and magnitude of any potential bias                                                   | 11-12         |
| 8  | Interpretation           | 20 | Give a cautious overall interpretation of results considering objectives, limitations, multiplicity of analyses, results from similar studies, and other relevant evidence                                   | 12            |
| 9  | Generalisability         | 21 | Discuss the generalisability (external validity) of the study results                                                                                                                                        | 12            |
| 10 | <b>Other information</b> |    |                                                                                                                                                                                                              |               |
| 11 | Funding                  | 22 | Give the source of funding and the role of the funders for the present study and, if applicable, for the original study on which the present article is based                                                | Title page    |

\*Give information separately for exposed and unexposed groups.

**Note:** An Explanation and Elaboration article discusses each checklist item and gives methodological background and published examples of transparent reporting. The STROBE checklist is best used in conjunction with this article (freely available on the Web sites of PLoS Medicine at <http://www.plosmedicine.org/>, Annals of Internal Medicine at <http://www.annals.org/>, and Epidemiology at <http://www.epidem.com/>). Information on the STROBE Initiative is available at <http://www.strobe-statement.org>.
